# Supplementary material for: Accuracy of Tumour-Associated Circulating Endothelial Cells as a Screening Biomarker for Clinically Significant Prostate Cancer
Source: MDPI journal article supplement (doi:10.3390/cancers11081064), 2019-07-27
Supplement: s1 [file s1]

## Supplementary Materials

# Accuracy of Tumour-Associated Circulating Endothelial Cells as a Screening Biomarker for Clinically Significant Prostate Cancer

Sebastian Chakrit Bhakdi, Prapat Suriyaphol, Ponpan Thaicharoen, Sebastian Tobias Karl Grote, Chulaluk Komoltri, Bansithi Chaiyaprasithi and Komgrid Charnkaew

## Part A

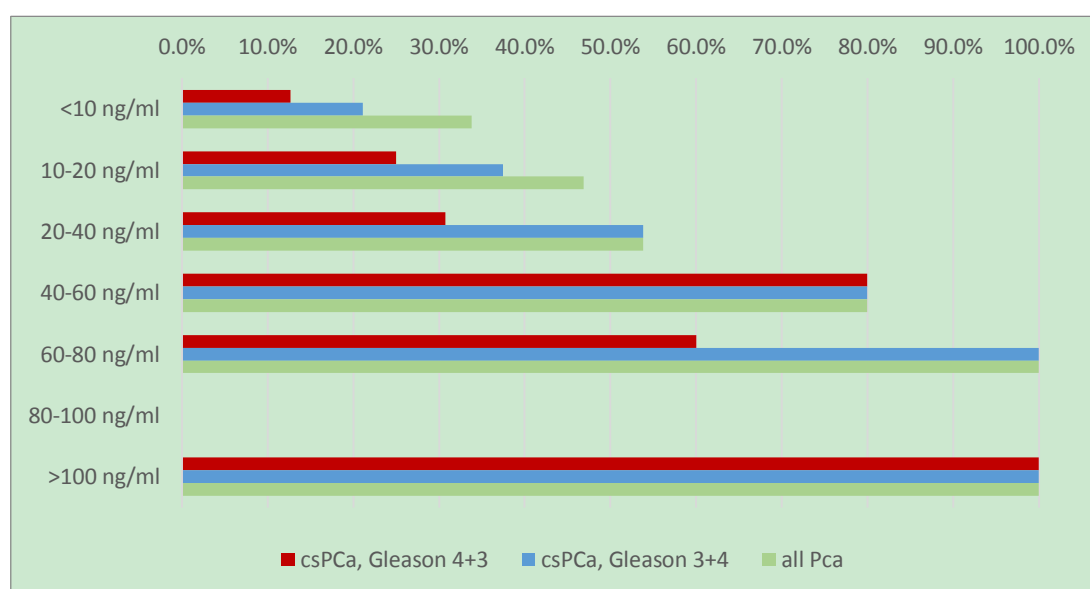

**Figure S1.** Prevalence of all cancer and clinically significant cancer according to primary and secondary definition (Gleason 4 + 3 and Gleason 3 + 4) in included group of men. Overall results from first and second TRUS biopsies.

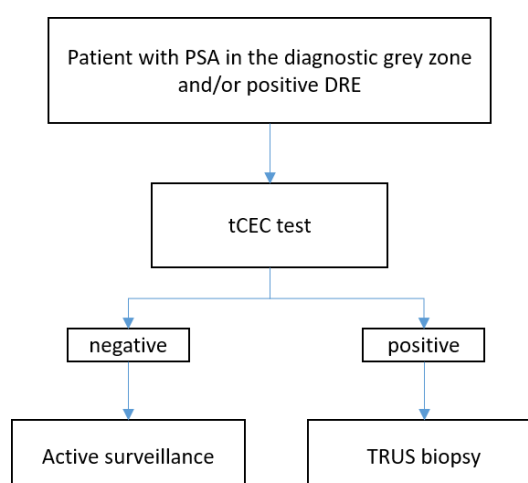

**Figure S2.** Diagnostic workflow for estimation of clinical utility of using the tCEC test as add-on triage test for patients with elevated PSA and/or positive digital rectal examination.

**Table S1.** Accuracy of the tCEC test for all PSA ranges.

| All PCa                     |                 |                           |                 |                           |             |             |      |     |
|-----------------------------|-----------------|---------------------------|-----------------|---------------------------|-------------|-------------|------|-----|
| PSA<br>ng/mL                | CEC+<br>Biopsy+ | CEC+ Biopsy-              | CEC-<br>Biopsy+ | CEC- Biopsy-              | Sensitivity | Specificity | PPV  | NPV |
| <10                         | 15              | 13                        | 7               | 34                        | 68%         | 72%         | 54%  | 83% |
| 10–20                       | 9               | 6                         | 7               | 12                        | 56%         | 67%         | 60%  | 63% |
| 20–40                       | 3               | 3                         | 4               | 3                         | 43%         | 50%         | 50%  | 43% |
| 40–60                       | 2               | 0                         | 2               | 1                         | 50%         | 100%        | 100% | 33% |
| 60–80                       | 5               | 0                         | 0               | 0                         | 100%        | NA          | 100% | NA  |
| 80–100                      | 0               | 0                         | 0               | 0                         | NA          | NA          | NA   | NA  |
| >100                        | 15              | 0                         | 5               | 0                         | 75          | NA          | 100  | 0   |
| <b>total</b>                | <b>49</b>       | <b>22</b>                 | <b>25</b>       | <b>50</b>                 |             |             |      |     |
| csPCa, Gleason $\geq 3 + 4$ |                 |                           |                 |                           |             |             |      |     |
| PSA<br>ng/mL                | CEC+<br>Biopsy+ | CEC+ Biopsy-<br>or csPCa- | CEC-<br>Biopsy+ | CEC- Biopsy-<br>or csPCa- | Sensitivity | Specificity | PPV  | NPV |
| <10                         | 9               | 19                        | 3               | 38                        | 75%         | 67%         | 32%  | 93% |
| 10–20                       | 7               | 8                         | 5               | 14                        | 58%         | 64%         | 47%  | 74% |
| 20–40                       | 3               | 3                         | 4               | 3                         | 43%         | 50%         | 50%  | 43% |
| 40–60                       | 2               | 0                         | 2               | 1                         | 50%         | 100%        | 100% | 33% |
| 60–80                       | 5               | 0                         | 0               | 0                         | 100%        | NA          | 100% | NA  |
| 80–100                      | 0               | 0                         | 0               | 0                         | NA          | NA          | NA   | NA  |
| >100                        | 15              | 0                         | 5               | 0                         | 75%         | NA          | 100% | 0%  |
| <b>Total</b>                | <b>41</b>       | <b>30</b>                 | <b>19</b>       | <b>56</b>                 |             |             |      |     |
| csPCa, Gleason $\geq 4 + 3$ |                 |                           |                 |                           |             |             |      |     |
| PSA<br>ng/mL                | CEC+<br>Biopsy+ | CEC+ biopsy-<br>or csPCa- | CEC-<br>Biopsy+ | CEC- Biopsy-<br>or csPCa- | Sensitivity | Specificity | PPV  | NPV |
| <10                         | 5               | 23                        | 2               | 39                        | 71%         | 63%         | 18%  | 95% |
| 10–20                       | 4               | 11                        | 4               | 15                        | 50%         | 58%         | 27%  | 79% |
| 20–40                       | 1               | 5                         | 3               | 4                         | 25%         | 44%         | 17%  | 57% |
| 40–60                       | 2               | 0                         | 2               | 1                         | 50%         | 100%        | 100% | 33% |
| 60–80                       | 3               | 2                         | 0               | 0                         | 100%        | 0%          | 60%  | NA  |
| 80–100                      | 0               | 0                         | 0               | 0                         | NA          | NA          | NA   | NA  |
| >100                        | 15              | 0                         | 5               | 0                         | 75%         | NA          | 100% | 0%  |
| <b>Total</b>                | <b>30</b>       | <b>41</b>                 | <b>16</b>       | <b>59</b>                 |             |             |      |     |

**Table S2.** Number of patients who received a second TRUS biopsy during active surveillance and tCEC test results.

| PSA Reading<br>(ng/mL) | Negative<br>1st Biopsy | Received<br>2nd Biopsy | of Which<br>Originally<br>CEC+ | CEC+, 2nd<br>Biopsy+,<br>All Pca | CEC-, 2nd<br>Biopsy+,<br>All Pca | CEC+, 2nd<br>Biopsy+,<br>Gleason $\geq 4 + 3$ | CEC+, 2nd<br>Biopsy+,<br>Gleason $\geq 3 + 4$ |
|------------------------|------------------------|------------------------|--------------------------------|----------------------------------|----------------------------------|-----------------------------------------------|-----------------------------------------------|
| <10                    | 49                     | 8                      | 5                              | 2                                | 0                                | 2                                             | 2                                             |
| 10–20                  | 19                     | 4                      | 3                              | 1                                | 0                                | 1                                             | 1                                             |
| 20–40                  | 7                      | 4                      | 3                              | 1                                | 0                                | 0                                             | 1                                             |
| 40–60                  | 1                      | 0                      | 0                              | 0                                | 0                                | 0                                             | 0                                             |
| 60–80                  | 0                      | 0                      | 0                              | 0                                | 0                                | 0                                             | 0                                             |
| 80–100                 | 0                      | 0                      | 0                              | 0                                | 0                                | 0                                             | 0                                             |
| >100                   | 1                      | 1                      | 1                              | 1                                | 0                                | 1                                             | 1                                             |

**Table S3.** Potential implications of adding the tCEC test to the screening workflow for prostate cancer.**A) Relative Reduction of Over-Diagnosis According to the Primary Definition**

| PSA<br>ng/mL | Screening with PSA Alone |                                 | Screening with tCEC Triage Test |                                        | CI 95% |
|--------------|--------------------------|---------------------------------|---------------------------------|----------------------------------------|--------|
|              | Primary biopsies         | over-diagnosed<br>Gleason 3 + 4 | over-diagnosed<br>Gleason 3 + 4 | relative reduction of<br>overdiagnosis |        |
| <10          | 69                       | 10                              | 6                               | 40%                                    |        |
| 10–20        | 34                       | 4                               | 2                               | 50%                                    |        |
| 20–40        | 13                       | 0                               | 0                               | 0%                                     |        |
| 40–60        | 5                        | 0                               | 0                               | 0%                                     |        |
| 60–80        | 5                        | 0                               | 0                               | 0%                                     |        |
| 80–100       | 0                        | 0                               | 0                               | NA                                     |        |
| >100         | 20                       | 0                               | 0                               | 0%                                     |        |

**B) Relative Reduction of Over-Diagnosis According to the Secondary Definition**

| PSA<br>ng/mL | Screening with PSA Alone |                                 | Screening with tCEC Triage Test |                                        | CI 95% |
|--------------|--------------------------|---------------------------------|---------------------------------|----------------------------------------|--------|
|              | Primary biopsies         | over-diagnosed<br>Gleason 4 + 3 | over-diagnosed<br>Gleason 4 + 3 | relative reduction of<br>overdiagnosis |        |
| <10          | 69                       | 15                              | 10                              | 33%                                    |        |
| 10–20        | 34                       | 8                               | 5                               | 38%                                    |        |
| 20–40        | 13                       | 3                               | 2                               | 33%                                    |        |
| 40–60        | 5                        | 0                               | 0                               | 0%                                     |        |
| 60–80        | 5                        | 2                               | 2                               | 0%                                     |        |
| 80–100       | 0                        | 0                               | 0                               | NA                                     |        |
| >100         | 20                       | 0                               | 0                               | NA                                     |        |

**C) Reduction of Total Biopsies**

| PSA<br>ng/mL | Screening with PSA Alone |                | Screening with tCEC Triage Test |        |
|--------------|--------------------------|----------------|---------------------------------|--------|
|              | Primary biopsies         | biopsies saved | reduction of total biopsies     | CI 95% |
| <10          | 69                       | 41             | 59%                             |        |
| 10–20        | 34                       | 19             | 56%                             |        |
| 20–40        | 13                       | 7              | 54%                             |        |
| 40–60        | 5                        | 3              | 60%                             |        |
| 60–80        | 5                        | 0              | 0%                              |        |
| 80–100       | 0                        | 0              | NA                              |        |
| >100         | 20                       | 5              | 25%                             |        |

## Part B

### Material and Reagents

#### 1. Red and White Blood Cell Depletion of Heparinised Whole Blood Samples

Equipment and Materials Required:

|                               |                                 |
|-------------------------------|---------------------------------|
| hMX™ Lysis buffer             | X-Zell, Singapore               |
| PBS/EDTA 5mM/ FBS 1%          | Biochrom, Berlin, Germany       |
| hMX™ anti-Biotin beads        | X-Zell, Singapore               |
| hMX™ Columns 1.5g             | X-Zell, Singapore               |
| hMX™ flow resistor            | X-Zell, Singapore               |
| hMX™ Priming solution         | X-Zell, Singapore               |
| hMX™ Separation buffer        | X-Zell, Singapore               |
| Washing buffer                | X-Zell, Singapore               |
| FC Block                      | Biolegend, San Diego, CA, USA   |
| D-Biotin 0.05%                | X-Zell, Singapore               |
| Blocking Buffer I             | X-Zell, Singapore               |
| Anti-CD45 biotin              | Exbio, Prague, Czech Republic   |
| Anti-CD235a biotin            | Ebioscience, San Diego, CA, USA |
| Purified anti-biotin antibody | Biolegend, San Diego, CA, USA   |

#### 2. Cryoimmunostaining

Equipment and Materials Required:

|                           |                               |
|---------------------------|-------------------------------|
| Cytofuge 2                | StatSpin, Atlanta, GA, USA    |
| Cryofixation Station      | X-Zell, Singapore             |
| Cryostainer               | X-Zell, Singapore             |
| Cytocentrifuge Buffer     | X-Zell, Singapore             |
| Cryostaining buffer       | X-Zell, Singapore             |
| Blocking buffer I         | X-Zell, Singapore             |
| Blocking buffer II        | X-Zell, Singapore             |
| FC block                  | Biolegend, San Diego, CA, USA |
| CapGap clips              | X-Zell, Singapore             |
| Cell-adhesive slides      | X-Zell, Singapore             |
| Cryofixation Buffer I     | X-Zell, Singapore             |
| Cryofixation Buffer II    | X-Zell, Singapore             |
| Slide Fixation cartridges | X-Zell, Singapore             |
| Priming solution II       | X-Zell, Singapore             |
| Premount buffer           | X-Zell, Singapore             |
| Mounting Buffer           | X-Zell, Singapore             |

  

| Fluorophore | Antibody        | Clone   | Source | Isotype    |
|-------------|-----------------|---------|--------|------------|
| BV421       | CD34            | 581     | BD     | Mouse IgG1 |
| PO          | CD45            | HI30    | EXB    | Mouse IgG1 |
| AF488       | Vimentin        | EPR3776 | ABC    | Rabbit IgG |
| PE          | Pan-Cytokeratin | C-11    | ABC    | Mouse IgG1 |
| PE          | CD326 (EpCAM)   | VU-1D9  | EXB    | Mouse IgG1 |
| AF594       | CD31            | WM59    | BLG    | Mouse IgG1 |
| DRAQ5       | Nuclear Dye     | -       | BST    | -          |

Abbreviations: AF = AlexaFluor, BV =BrilliantViolet, PB = Pacific Blue, PO =Pacific Orange. ABC = Abcam, Cambridge, UK; BD = BD Bioscience, San Jose, USA; BLG = Biolegend, San Diego, CA, USA; EXB = exbio, Czech Republic; BST = Biostatus, Leicestershire, UK.
